# Supplementary material
Source: publisher site journal article supplement (https://www.dovepress.com/get_supplementary_file.php?f=207460.docx)

**Supplementary materials**

- Carcinomas, Renal Cell
- Renal Cell Carcinomas
- Adenocarcinoma, Renal Cell
- Adenocarcinomas, Renal Cell
- Renal Cell Adenocarcinoma
- Renal Cell Adenocarcinomas
- Adenocarcinoma Of Kidney
- Adenocarcinoma Of Kidneys
- Kidney, Adenocarcinoma Of
- Kidneys, Adenocarcinoma Of
- Renal Cell Cancer
- Cancer, Renal Cell
- Cancers, Renal Cell
- Renal Cell Cancers
- Adenocarcinoma, Renal
- Adenocarcinomas, Renal
- Renal Adenocarcinoma
- Renal Adenocarcinomas
- Nephroid Carcinoma
- Carcinoma, Nephroid
- Carcinomas, Nephroid
- Nephroid Carcinomas
- Renal Cell Carcinoma
- Chromophobe Renal Cell Carcinoma
- Sarcomatoid Renal Cell Carcinoma
- Papillary Renal Cell Carcinoma
- Renal Cell Carcinoma, Papillary
- Chromophil Renal Cell Carcinoma
- Clear Cell Renal Cell Carcinoma
- Grawitz Tumor
- Tumor, Grawitz
- Clear Cell Renal Carcinoma
- Carcinoma, Hypernephroid
- Carcinomas, Hypernephroid
- Hypernephroid Carcinoma
- Hypernephroid Carcinomas
- Hypernephroma
- Hypernephromas
- Collecting Duct Carcinoma (Kidney)
- Carcinoma, Collecting Duct (Kidney)
- Carcinomas, Collecting Duct (Kidney)
- Collecting Duct Carcinomas (Kidney)
- Collecting Duct Carcinoma of the Kidney
- Renal Collecting Duct Carcinoma
- Collecting Duct Carcinoma
- Carcinoma, Collecting Duct
- Carcinomas, Collecting Duct
- Collecting Duct Carcinomas
- Dehydrogenase, Succinate
- Succinic Dehydrogenase
- Dehydrogenase, Succinic
- Succinic Oxidase
- Oxidase, Succinic
- Fumarate Reductase
- Reductase, Fumarate

PUBMED

**History**

[Download history](https://www.ncbi.nlm.nih.gov/pubmed?p$l=Email&Mode=download&dlid=history&filename=history.csv&db=pubmed&historyid=NCID_1_8466308_130.14.18.48_5555_1519539795_1433551170_0MetA0_S_HStore&p$debugoutput=off)[Clear history](https://www.ncbi.nlm.nih.gov/pubmed/advanced)

| Recent queries | | | | |
| --- | --- | --- | --- | --- |
| Search | Add to builder | Query | Items found | Time |
| [#29](https://www.ncbi.nlm.nih.gov/pubmed/advanced) | [Add](https://www.ncbi.nlm.nih.gov/pubmed/advanced) | Search **((("succinate dehydrogenase"[Title/Abstract]) OR "sdh mutations"[Title/Abstract]) AND "renal cell carcinoma"[Title/Abstract]) AND ("1990/01/01"[Date - Publication] : "2018/02/24"[Date - Publication])** | [74](https://www.ncbi.nlm.nih.gov/pubmed/?cmd=HistorySearch&querykey=29) | 08:31:45 |
| [#13](https://www.ncbi.nlm.nih.gov/pubmed/advanced) | [Add](https://www.ncbi.nlm.nih.gov/pubmed/advanced) | Search **(((((Succinate dehydrogenase[Title/Abstract]) OR SDH[Title/Abstract]) AND "renal cell cancer"[Title/Abstract]) OR "kidney cell"[Title/Abstract]) OR Kidney cancers[Title/Abstract]) AND ("1990/01/01"[Date - Publication] : "2018/02/24"[Date - Publication])** | [2832](https://www.ncbi.nlm.nih.gov/pubmed/?cmd=HistorySearch&querykey=13) | 08:28:40 |
| [#12](https://www.ncbi.nlm.nih.gov/pubmed/advanced) | [Add](https://www.ncbi.nlm.nih.gov/pubmed/advanced) | Search **((((("succinate"[Title/Abstract]) OR "sdh mutations"[Title/Abstract]) OR "fumarate reductase"[Title/Abstract]) AND Renal[Title/Abstract]) OR Kidney[Title/Abstract]) AND ("1990/01/01"[Date - Publication] : "2018/02/24"[Date - Publication])** | [281443](https://www.ncbi.nlm.nih.gov/pubmed/?cmd=HistorySearch&querykey=12) | 08:12:10 |
| [#8](https://www.ncbi.nlm.nih.gov/pubmed/advanced) | [Add](https://www.ncbi.nlm.nih.gov/pubmed/advanced) | Search **(("kidney cancer"[Title/Abstract]) AND "succinate dehydrogenase"[Title/Abstract]) AND ("1990/01/01"[Date - Publication] : "2018/02/24"[Date - Publication])** | [12](https://www.ncbi.nlm.nih.gov/pubmed/?cmd=HistorySearch&querykey=8) | 08:01:36 |
| [#7](https://www.ncbi.nlm.nih.gov/pubmed/advanced) | [Add](https://www.ncbi.nlm.nih.gov/pubmed/advanced) | Search **((("succinic dehydrogenase"[Title/Abstract]) AND "renal cell carcinoma"[Title/Abstract]) AND ("1990/01/01"[Date - Publication] : "2018/02/25"[Date - Publication]))/** | [1](https://www.ncbi.nlm.nih.gov/pubmed/?cmd=HistorySearch&querykey=7) | 01:57:32 |
| [#6](https://www.ncbi.nlm.nih.gov/pubmed/advanced) | [Add](https://www.ncbi.nlm.nih.gov/pubmed/advanced) | Search **(("succinic dehydrogenase"[Title/Abstract]) AND "renal cell carcinoma"[Title/Abstract]) AND ("1990/0101"[Date - Publication] : "2018/02/25"[Date - Publication])** | [1](https://www.ncbi.nlm.nih.gov/pubmed/?cmd=HistorySearch&querykey=6) | 01:56:52 |
| [#5](https://www.ncbi.nlm.nih.gov/pubmed/advanced) | [Add](https://www.ncbi.nlm.nih.gov/pubmed/advanced) | Search **Succinate dehydrogenase[Title/Abstract]** | [6777](https://www.ncbi.nlm.nih.gov/pubmed/?cmd=HistorySearch&querykey=5) | 01:55:02 |


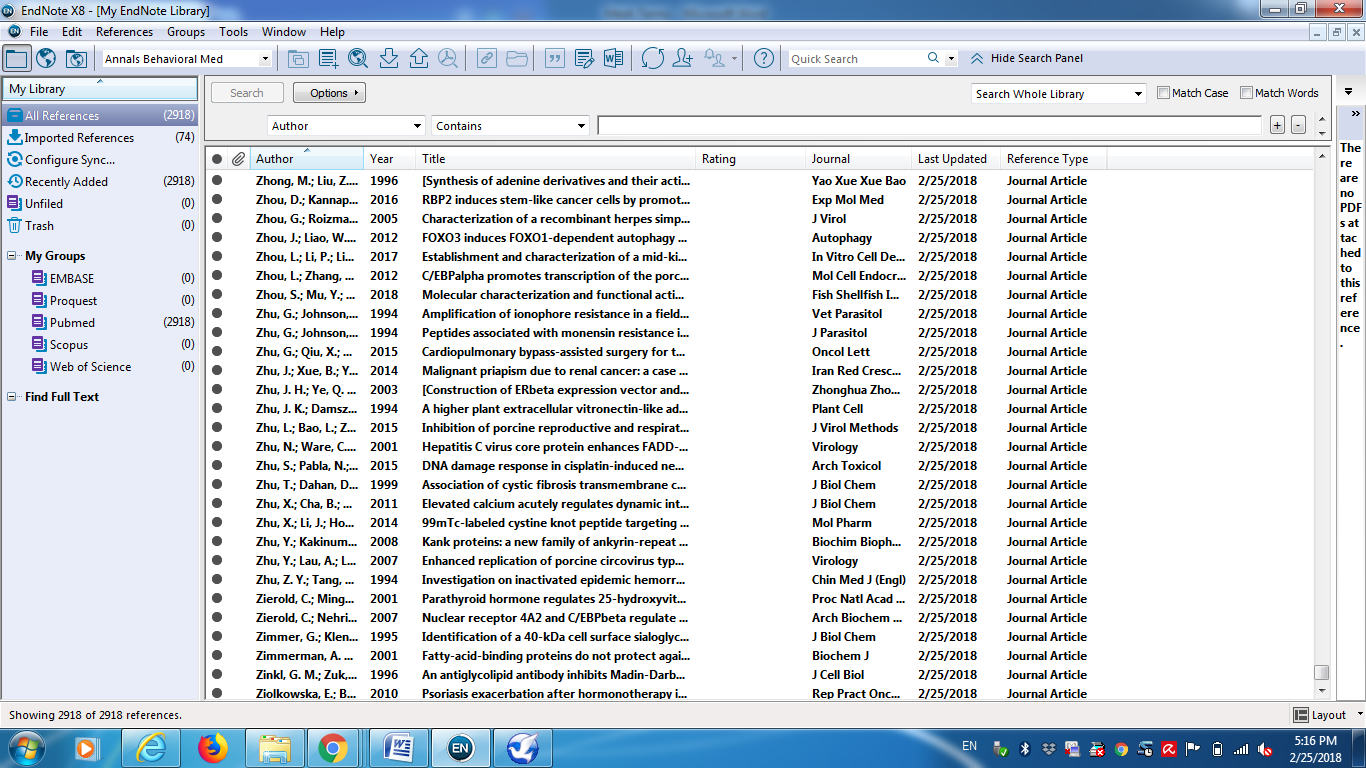


Web of Science

| 1 | **TOPIC:**("Succinate dehydrogenase") *AND***TOPIC:** ("renal cell")  **Timespan:** 1990-2018. **Indexes:** SCI-EXPANDED, SSCI, CPCI-S, CPCI-SSH, ESCI. | 178 | NNR: 20 |
| --- | --- | --- | --- |
|  | **TOPIC:**("Succinate dehydrogenase") *OR***TOPIC:** ("SDH")  **Timespan:** 1990-2018. **Indexes:** SCI-EXPANDED, SSCI, CPCI-S, CPCI-SSH, ESCI. | 9,475 |  |
|  | **You searched for:** **TOPIC:** ("renal cell cancer") *OR* **TOPIC:** ("kidney")  **Timespan:** 1990-2018. **Indexes:** SCI-EXPANDED, SSCI, CPCI-S, CPCI-SSH, ESCI. | 372,647 |  |
|  | #3 AND #2  **Timespan:** 1990-2018. **Indexes:** SCI-EXPANDED, SSCI, CPCI-S, CPCI-SSH, ESCI.  **# 3:**  **TOPIC:** ("renal cell cancer") *OR* **TOPIC:** ("kidney")  *Indexes=SCI-EXPANDED, SSCI, CPCI-S, CPCI-SSH, ESCI Timespan=1990-2018*  ***#2:***  **TOPIC:** ("Succinate dehydrogenase") *OR* **TOPIC:** ("SDH")  *Indexes=SCI-EXPANDED, SSCI, CPCI-S, CPCI-SSH, ESCI Timespan=1990-2018* | 276 |  |
|  | **TOPIC:** ("renal cell carcinoma") *AND* **TOPIC:**("Succinate dehydrogenase")  **Timespan:** 1990-2018. **Indexes:** SCI-EXPANDED, SSCI, CPCI-S, CPCI-SSH, ESCI. | 147 |  |
|  | **TOPIC:** ("renal cell ") *AND* **TOPIC:** ("Succinate dehydrogenase mutation")  **Timespan:** 1990-2018. **Indexes:** SCI-EXPANDED, SSCI, CPCI-S, CPCI-SSH, ESCI. | 2 |  |
|  | **TOPIC:** ("renal cell carcinoma") *AND* **TOPIC:**("Succinate dehydrogenase")  **Timespan:** 1990-2018. **Indexes:** SCI-EXPANDED, SSCI, CPCI-S, CPCI-SSH, ESCI. | 147 |  |
|  | **TOPIC:**("kidney cancers") *AND* **TOPIC:**("Succinate dehydrogenase")  **Timespan:** 1990-2018. **Indexes:** SCI-EXPANDED, SSCI, CPCI-S, CPCI-SSH, ESCI. | 8 |  |

[Search History: Web of Science Core Collection](javascript:;)

| **Set** | **Results** | **[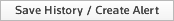](javascript:%20csiovl('SSSSave','');)[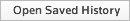](javascript:void(0);)** | **Edit Sets** | **Combine Sets**  **AND   OR** | **Delete Sets** |
| --- | --- | --- | --- | --- | --- |
| 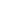 | | | | | |
| # 8 | [**8**](https://apps.webofknowledge.com/summary.do?product=WOS&doc=1&qid=25&SID=F3sW6qaU4Kl1aChRasT&search_mode=GeneralSearch&update_back2search_link_param=yes) | **TOPIC:** ("kidney cancers") *AND* **TOPIC:** ("Succinate dehydrogenase")  *Indexes=SCI-EXPANDED, SSCI, CPCI-S, CPCI-SSH, ESCI Timespan=1990-2018* | [Edit](https://apps.webofknowledge.com/WOS_AdvancedSearch_input.do?product=WOS&SID=F3sW6qaU4Kl1aChRasT&search_mode=AdvancedSearch&replaceSetId=8&editState=init) |  |  |
| 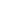 | | | | | |
| # 7 | [**147**](https://apps.webofknowledge.com/summary.do?product=WOS&doc=1&qid=24&SID=F3sW6qaU4Kl1aChRasT&search_mode=GeneralSearch&update_back2search_link_param=yes) | **TOPIC:** ("renal cell carcinoma") *AND* **TOPIC:** ("Succinate dehydrogenase")  *Indexes=SCI-EXPANDED, SSCI, CPCI-S, CPCI-SSH, ESCI Timespan=1990-2018* | [Edit](https://apps.webofknowledge.com/WOS_AdvancedSearch_input.do?product=WOS&SID=F3sW6qaU4Kl1aChRasT&search_mode=AdvancedSearch&replaceSetId=7&editState=init) |  |  |
| 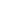 | | | | | |
| # 6 | [**2**](https://apps.webofknowledge.com/summary.do?product=WOS&doc=1&qid=23&SID=F3sW6qaU4Kl1aChRasT&search_mode=GeneralSearch&update_back2search_link_param=yes) | **TOPIC:** ("renal cell ") *AND* **TOPIC:** ("Succinate dehydrogenase mutation")  *Indexes=SCI-EXPANDED, SSCI, CPCI-S, CPCI-SSH, ESCI Timespan=1990-2018* | [Edit](https://apps.webofknowledge.com/WOS_AdvancedSearch_input.do?product=WOS&SID=F3sW6qaU4Kl1aChRasT&search_mode=AdvancedSearch&replaceSetId=6&editState=init) |  |  |
| 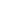 | | | | | |
| # 5 | [**147**](https://apps.webofknowledge.com/summary.do?product=WOS&doc=1&qid=18&SID=F3sW6qaU4Kl1aChRasT&search_mode=GeneralSearch&update_back2search_link_param=yes) | **TOPIC:** ("renal cell carcinoma") *AND* **TOPIC:** ("Succinate dehydrogenase")  *Indexes=SCI-EXPANDED, SSCI, CPCI-S, CPCI-SSH, ESCI Timespan=1990-2018* | [Edit](https://apps.webofknowledge.com/WOS_AdvancedSearch_input.do?product=WOS&SID=F3sW6qaU4Kl1aChRasT&search_mode=AdvancedSearch&replaceSetId=5&editState=init) |  |  |
| 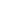 | | | | | |
| # 4 | [**276**](https://apps.webofknowledge.com/summary.do?product=WOS&doc=1&qid=9&SID=F3sW6qaU4Kl1aChRasT&search_mode=CombineSearches&update_back2search_link_param=yes) | #3 AND #2  *Indexes=SCI-EXPANDED, SSCI, CPCI-S, CPCI-SSH, ESCI Timespan=1990-2018* | [Edit](https://apps.webofknowledge.com/WOS_AdvancedSearch_input.do?product=WOS&SID=F3sW6qaU4Kl1aChRasT&search_mode=AdvancedSearch&replaceSetId=4&editState=init) |  |  |
| 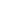 | | | | | |
| # 3 | [**372,647**](https://apps.webofknowledge.com/summary.do?product=WOS&doc=1&qid=8&SID=F3sW6qaU4Kl1aChRasT&search_mode=GeneralSearch&update_back2search_link_param=yes) | **TOPIC:** ("renal cell cancer") *OR* **TOPIC:** ("kidney")  *Indexes=SCI-EXPANDED, SSCI, CPCI-S, CPCI-SSH, ESCI Timespan=1990-2018* | [Edit](https://apps.webofknowledge.com/WOS_AdvancedSearch_input.do?product=WOS&SID=F3sW6qaU4Kl1aChRasT&search_mode=AdvancedSearch&replaceSetId=3&editState=init) |  |  |
| 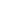 | | | | | |
| # 2 | [**9,475**](https://apps.webofknowledge.com/summary.do?product=WOS&doc=1&qid=7&SID=F3sW6qaU4Kl1aChRasT&search_mode=GeneralSearch&update_back2search_link_param=yes) | **TOPIC:** ("Succinate dehydrogenase") *OR* **TOPIC:** ("SDH")  *Indexes=SCI-EXPANDED, SSCI, CPCI-S, CPCI-SSH, ESCI Timespan=1990-2018* | [Edit](https://apps.webofknowledge.com/WOS_AdvancedSearch_input.do?product=WOS&SID=F3sW6qaU4Kl1aChRasT&search_mode=AdvancedSearch&replaceSetId=2&editState=init) |  |  |
| 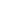 | | | | | |
| # 1 | [**178**](https://apps.webofknowledge.com/summary.do?product=WOS&doc=1&qid=1&SID=F3sW6qaU4Kl1aChRasT&search_mode=GeneralSearch&update_back2search_link_param=yes) | **TOPIC:** ("Succinate dehydrogenase") *AND* **TOPIC:** ("renal cell")  *Indexes=SCI-EXPANDED, SSCI, CPCI-S, CPCI-SSH, ESCI Timespan=1990-2018* | [Edit](https://apps.webofknowledge.com/WOS_AdvancedSearch_input.do?product=WOS&SID=F3sW6qaU4Kl1aChRasT&search_mode=AdvancedSearch&replaceSetId=1&editState=init) |  |  |
| 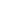 | | | | | |
|  |  |  |  | AND   OR |  |


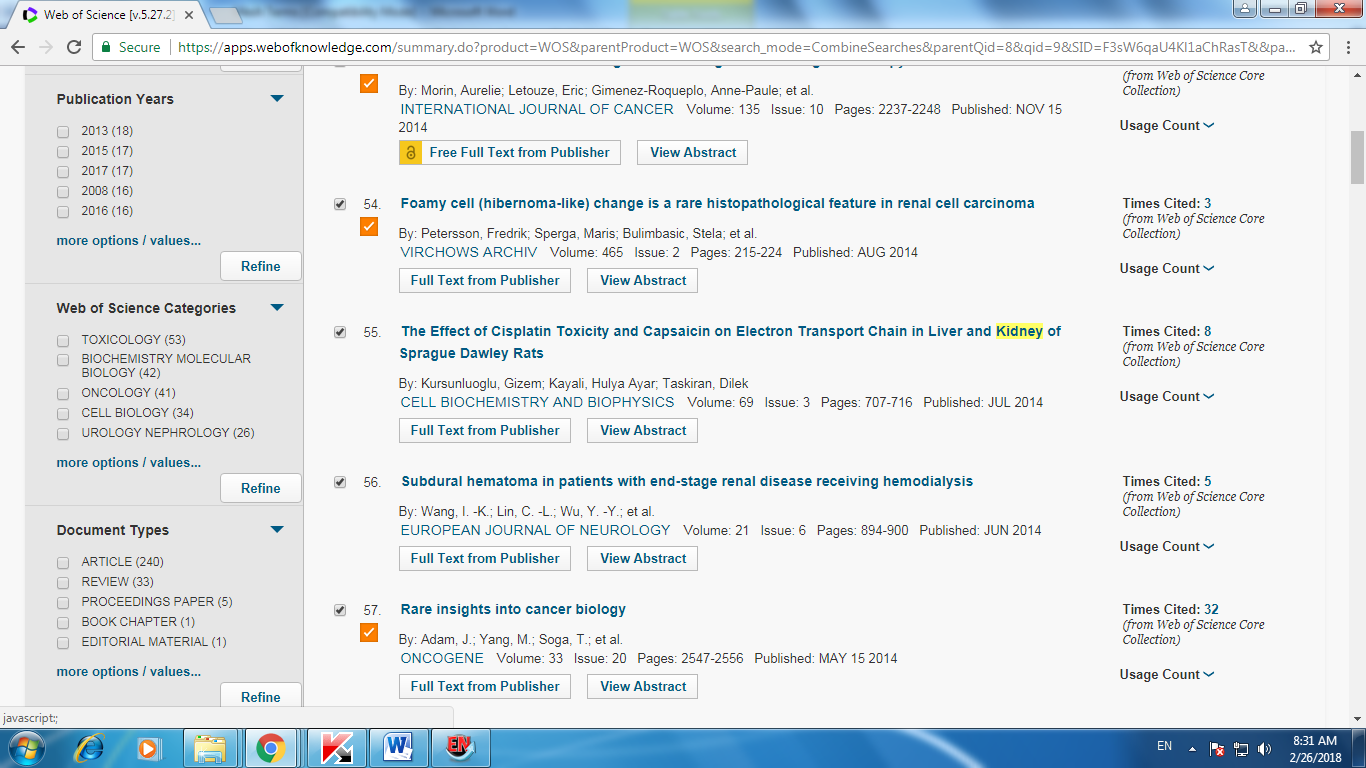


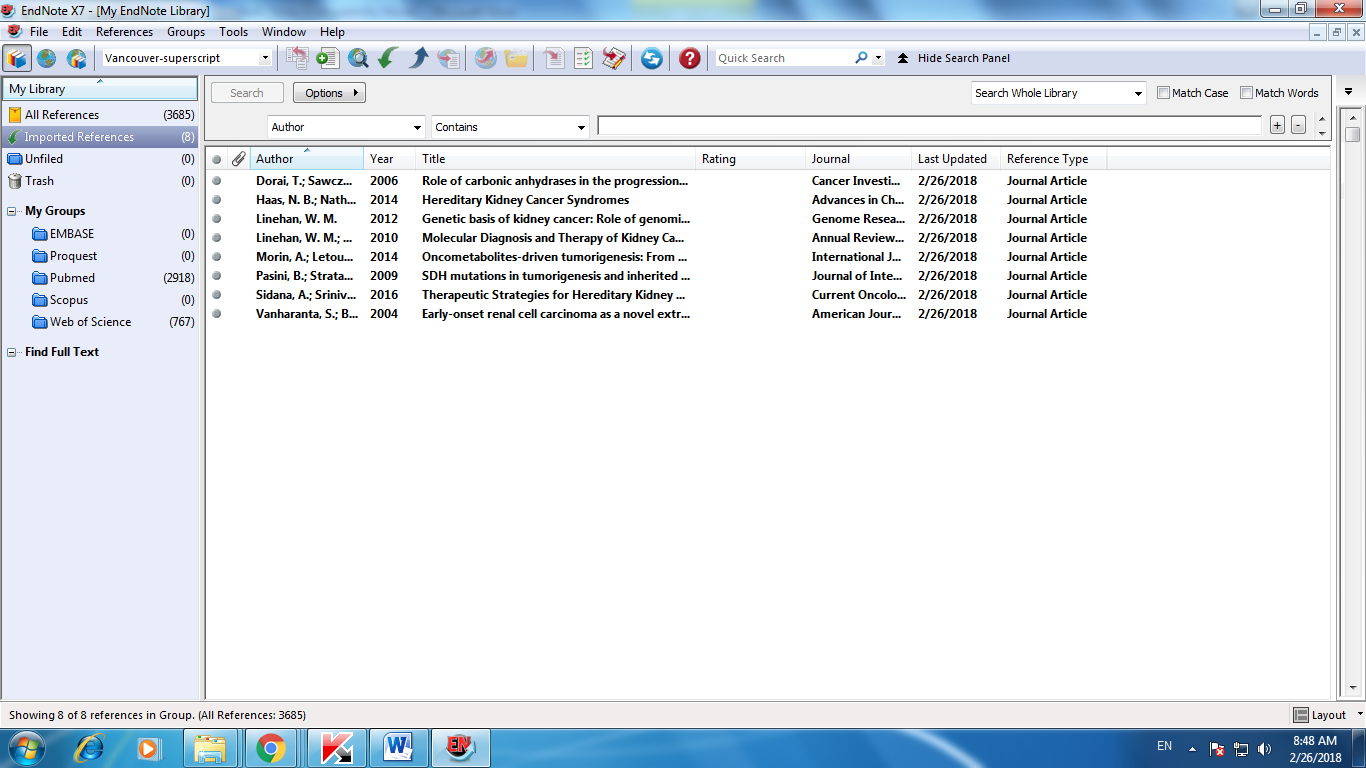


Scopus

|  |  |  |  |  |
| --- | --- | --- | --- | --- |
| 1 | ( TITLE-ABS-KEY ( "succinate dehydrogenase" )  AND  TITLE-ABS-KEY ( "renal cell carcinoma" )  OR  TITLE-ABS-KEY ( "renal cell cancer" ) )  AND  PUBYEAR  >  1989 | 156 |  |  |
|  | ( TITLE-ABS-KEY ( "succinate dehydrogenase" )  OR  TITLE-ABS-KEY ( "SDH" )  AND  TITLE-ABS-KEY ( "renal cell cancer" )  OR  TITLE-ABS-KEY ( "kidney cancer" ) )  AND  PUBYEAR  >  1989 | 82 |  |  |
|  | ( TITLE-ABS-KEY ( "succinate dehydrogenase" )  OR  TITLE-ABS-KEY ( "SDH" )  AND  TITLE-ABS-KEY ( "renal cell" )  OR  TITLE-ABS-KEY ( "kidney cancer" ) )  AND  PUBYEAR  >  1989 | 209 |  |  |
|  | ( TITLE-ABS-KEY ( "succinate dehydrogenase" )  OR  TITLE-ABS-KEY ( "SDH" )  AND  TITLE-ABS-KEY ( "kidney" ) )  AND  PUBYEAR  >  1989 | 716 |  |  |
|  | ( TITLE-ABS-KEY ( "succinate dehydrogenase" )  OR  TITLE-ABS-KEY ( "SDH" )  AND  TITLE-ABS-KEY ( "renal cell" ) )  AND  PUBYEAR  >  1989 | 193 |  |  |
|  | ( TITLE-ABS-KEY ( "succinate dehydrogenase" )  OR  TITLE-ABS-KEY ( "SDH" )  OR  TITLE-ABS-KEY ( fumarate )  AND  TITLE-ABS-KEY ( "renal cell" )  OR  TITLE-ABS-KEY ( "kidney" ) )  AND  PUBYEAR  >  1989 | 1,814 |  |  |
|  | ( TITLE-ABS-KEY ( "succinate dehydrogenase" )  OR  TITLE-ABS-KEY ( "SDH" )  AND  TITLE-ABS-KEY ( "renal cell" )  OR  TITLE-ABS-KEY ( "kidney" ) )  AND  PUBYEAR  >  1989 | 749 |  |  |
|  |  |  |  |  |
|  |  |  |  |  |
|  |  |  |  |  |


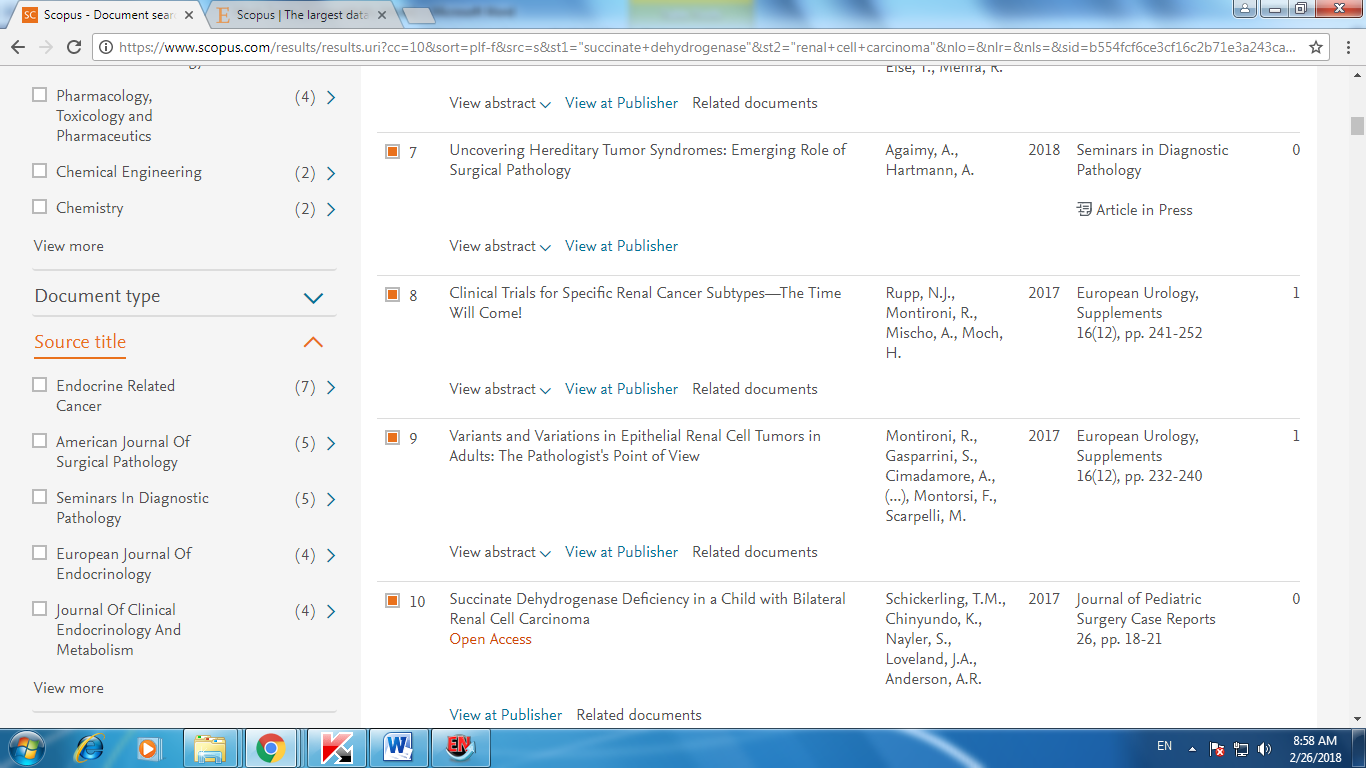


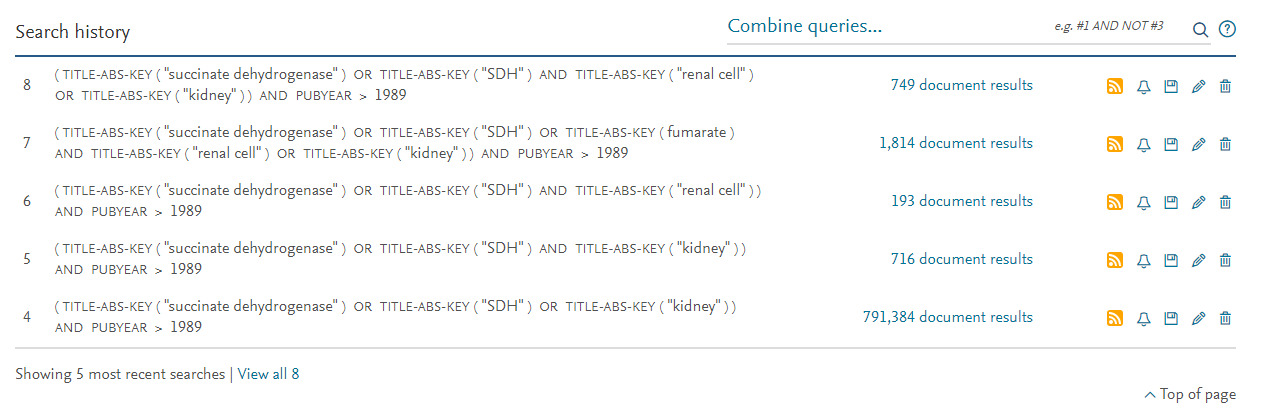


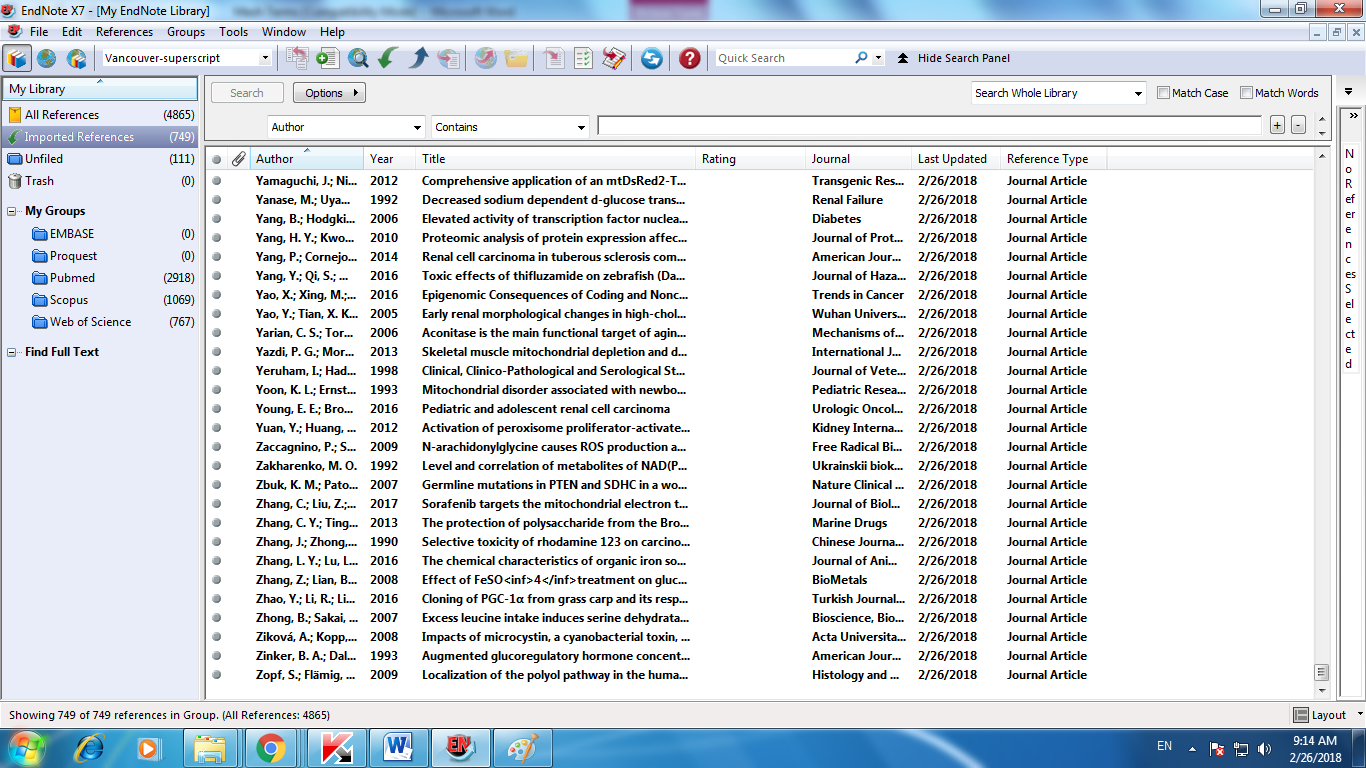


EMBASE

|  |  |  |  |  |
| --- | --- | --- | --- | --- |
|  | **'renal cell carcinoma'**:ab,ti AND **'succinate dehydrogenase'**:ab,ti AND [2018-2018]/py | 5 |  |  |
|  | ((**'renal cell'**:ab,ti OR **'kidney'**:ab,ti) AND **'succinate dehydrogenase'**:ab,ti OR **'sdh gene'**:ab,ti) AND [1990-2018]/py | 356 |  |  |
|  | (**'renal cell'**:ab,ti AND **'succinate dehydrogenase (ubiquinone)'**:ab,ti OR **'sdh gene'**:ab,ti) AND [1990-2018]/py | 90 |  |  |
|  | ((**'succinate dehydrogenase (ubiquinone)'**:ab,ti OR **'succinate dehydrogenase'**:ab,ti OR **'sdh gene'**:ab,ti) AND **'kidney disease'**:ab,ti OR **'urinary tract'**:ab,ti OR **'renal cell carcinoma'**:ab,ti) AND [1990-2018]/py | 116,939 |  |  |
|  | (**'succinate dehydrogenase'**:ab,ti OR **'sdh gene mutations'**:ab,ti) AND [1990-2018]/py | 4816 |  |  |
|  |  |  |  |  |
|  | Ombine #11 AND #13  #11((**'succinate dehydrogenase (ubiquinone)'**:ab,ti OR **'succinate dehydrogenase'**:ab,ti OR **'sdh gene'**:ab,ti) AND **'kidney disease'**:ab,ti OR **'urinary tract'**:ab,ti OR **'renal cell carcinoma'**:ab,ti) AND [1990-2018]/py  #13(**'succinate dehydrogenase'**:ab,ti OR **'sdh gene mutations'**:ab,ti) AND [1990-2018]/py | 111 |  |  |
|  | Combine #4 AND #5 | 5 |  |  |


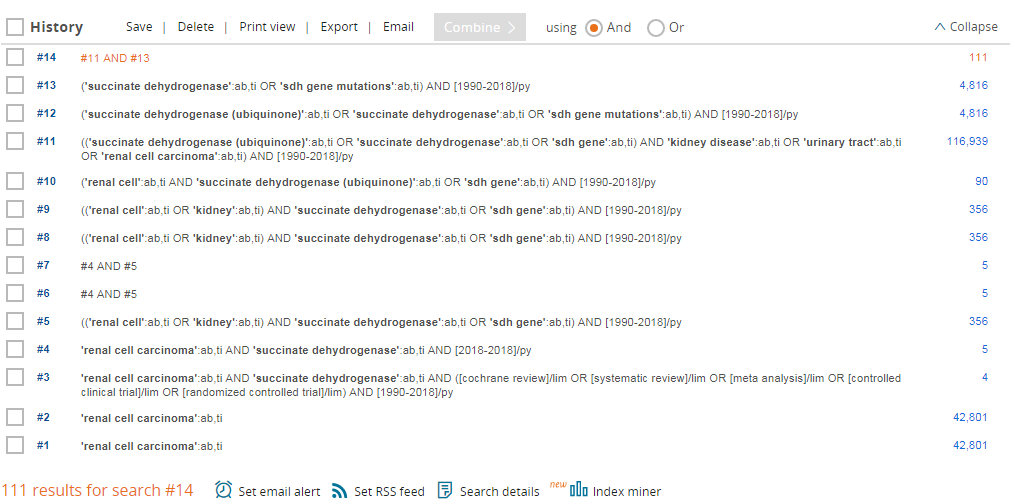


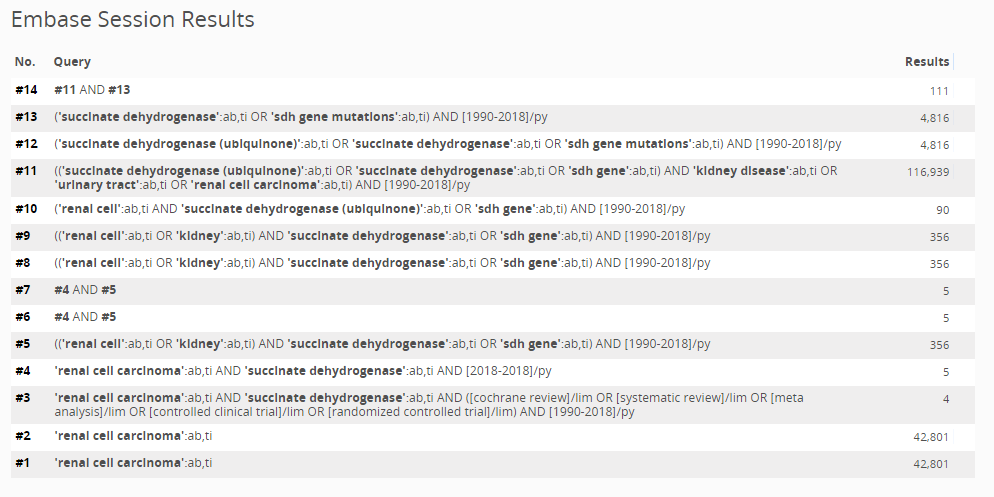


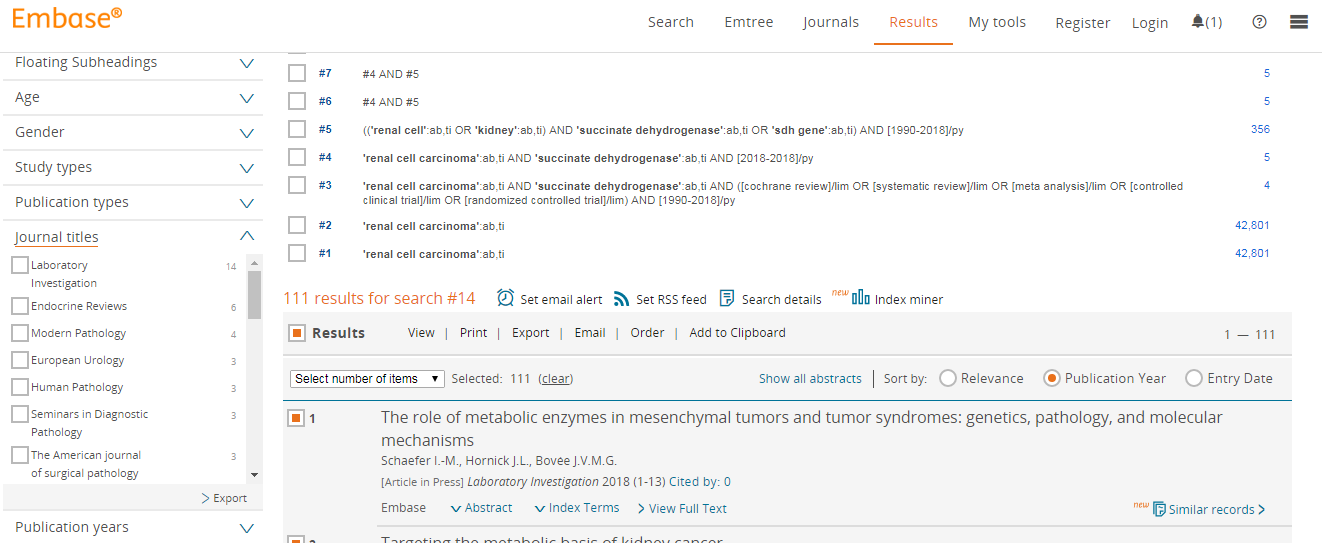


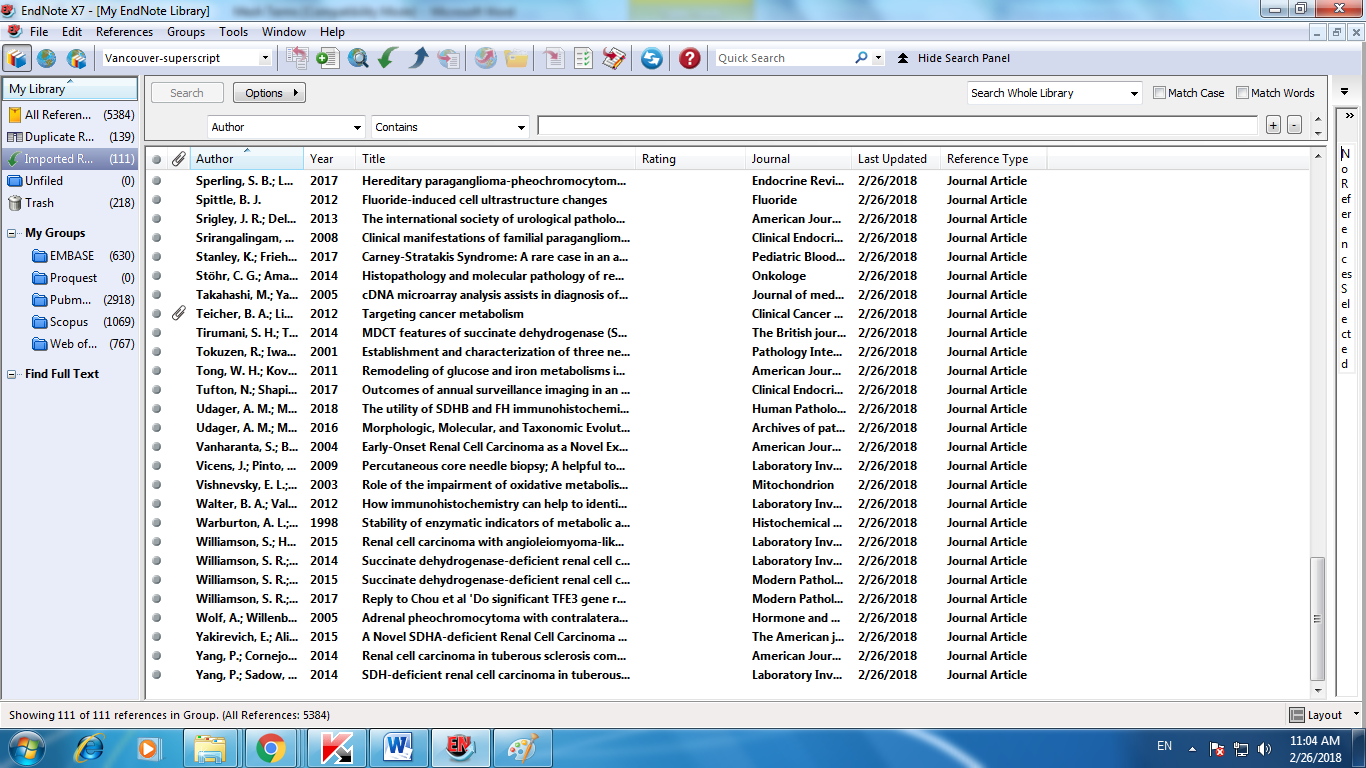


**2050 duplicated removed**


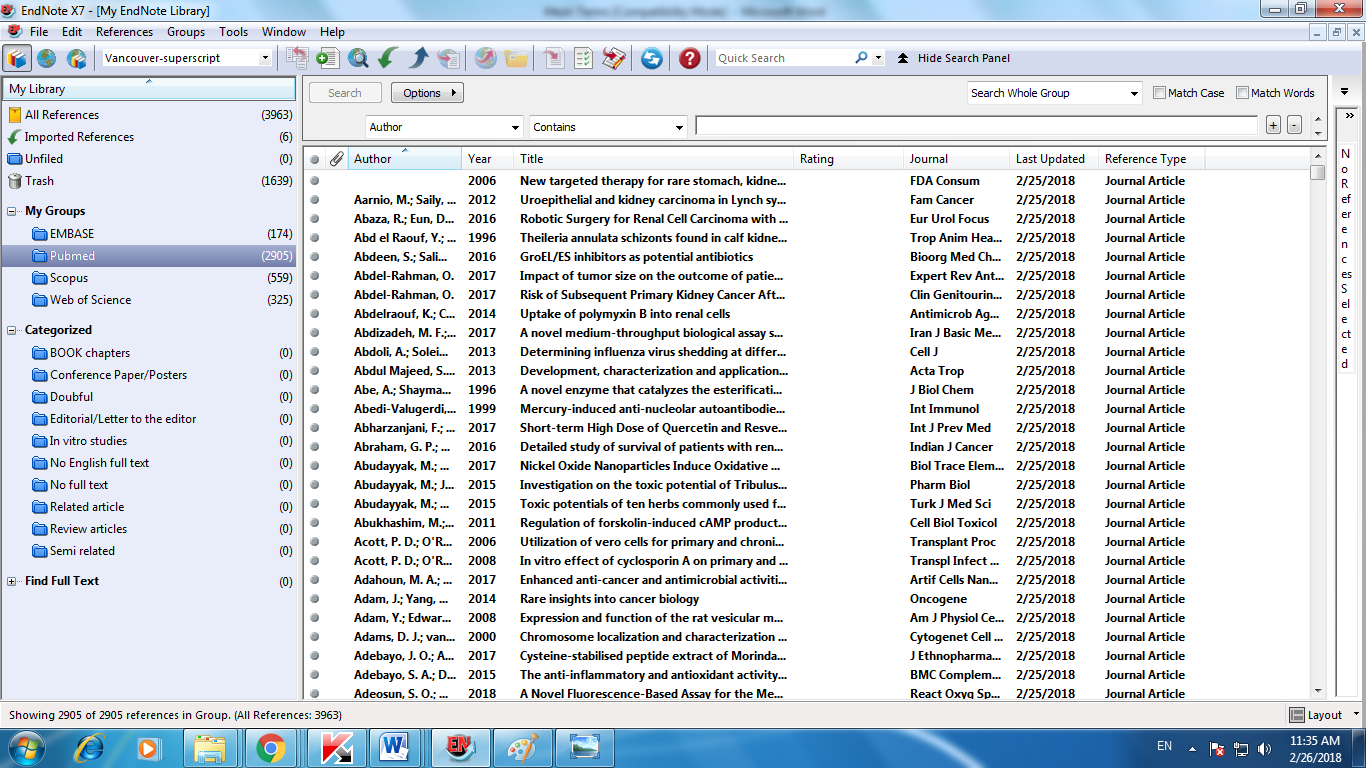


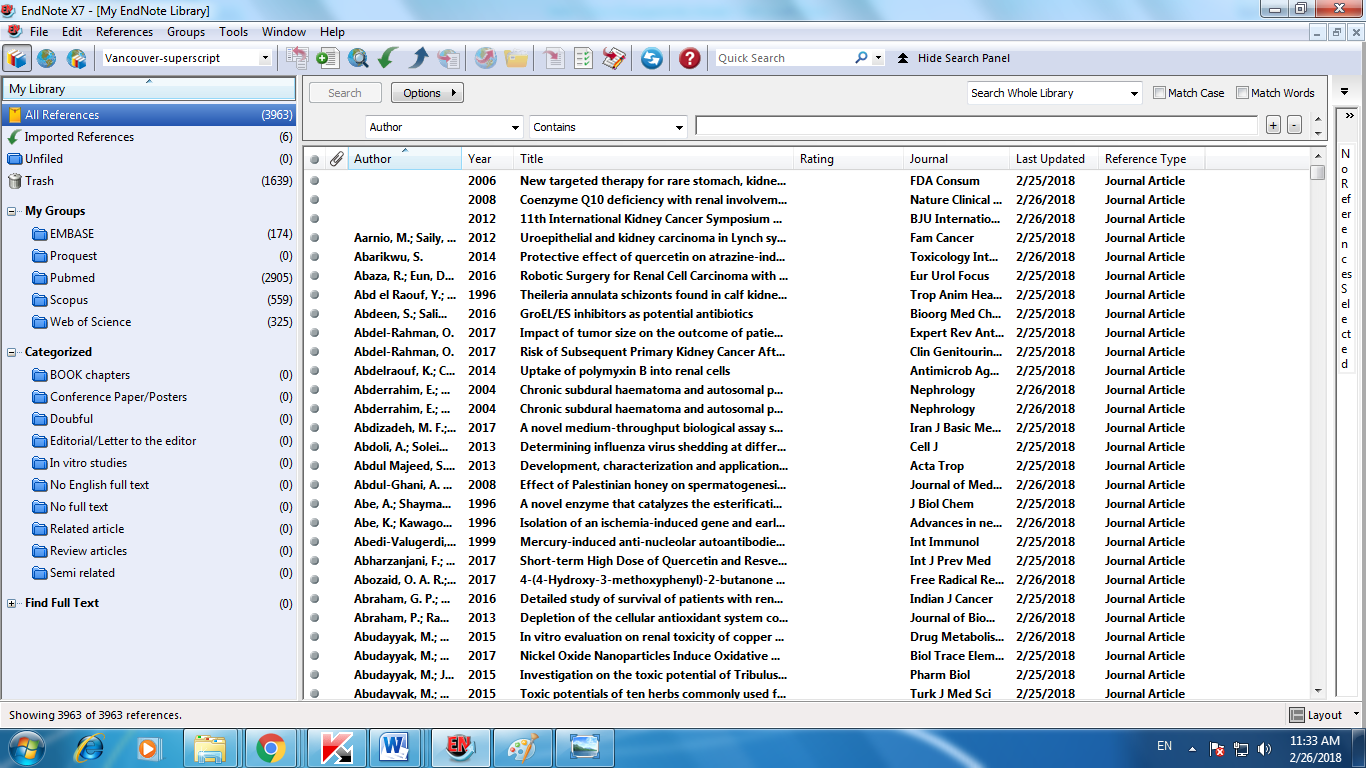


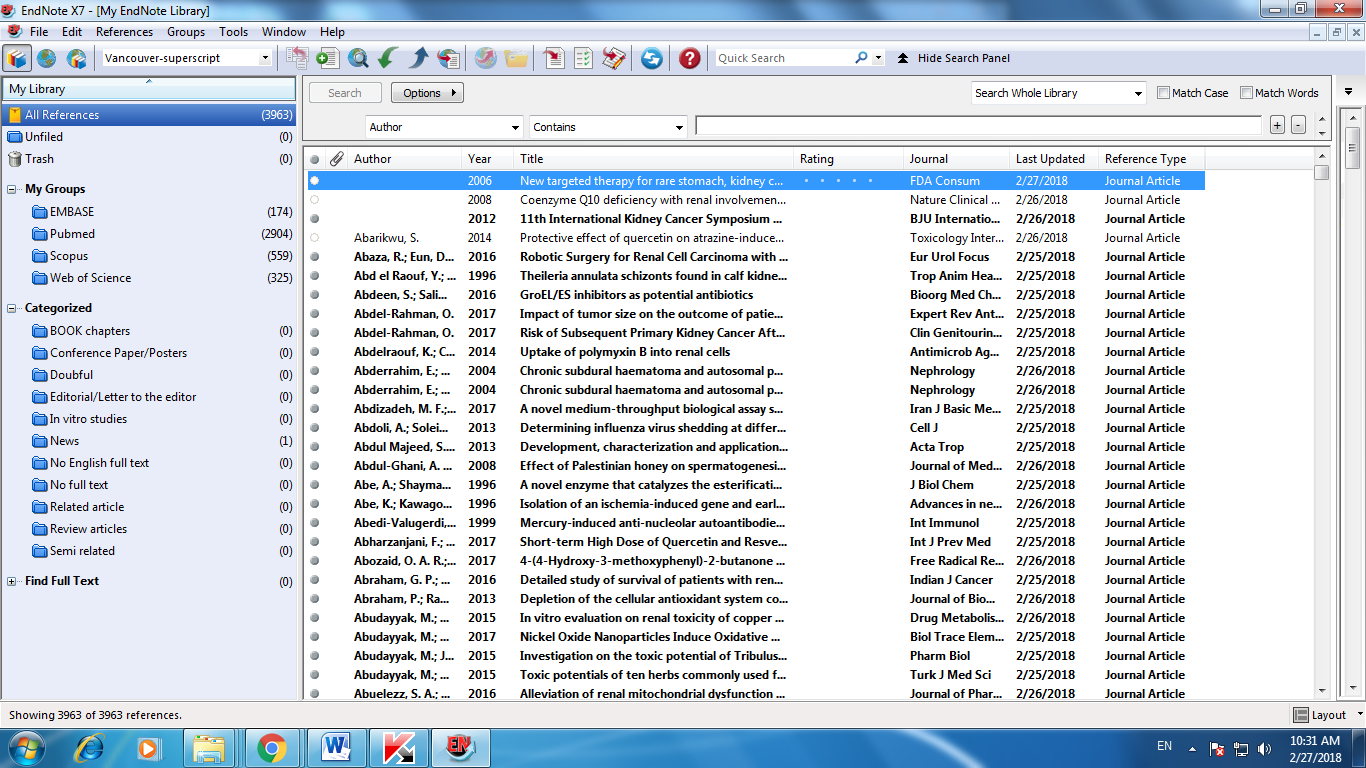


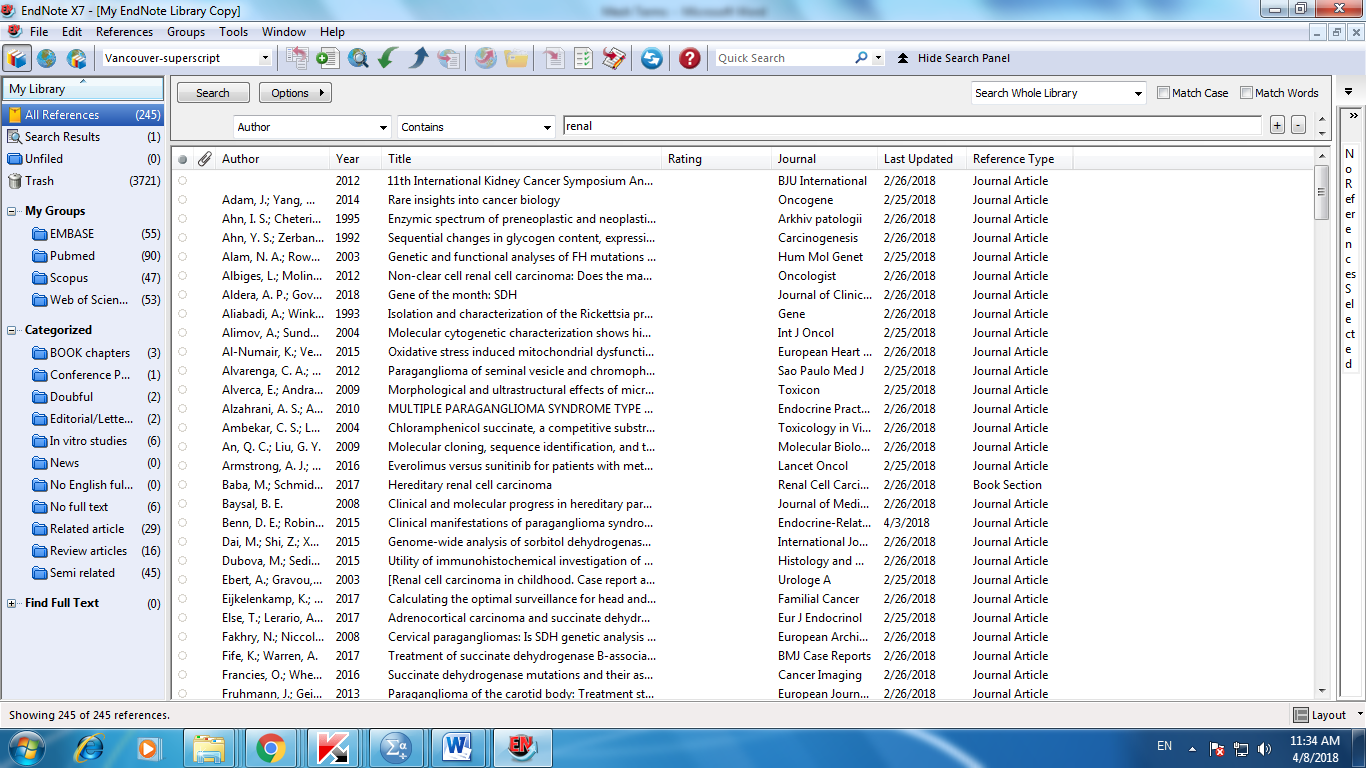


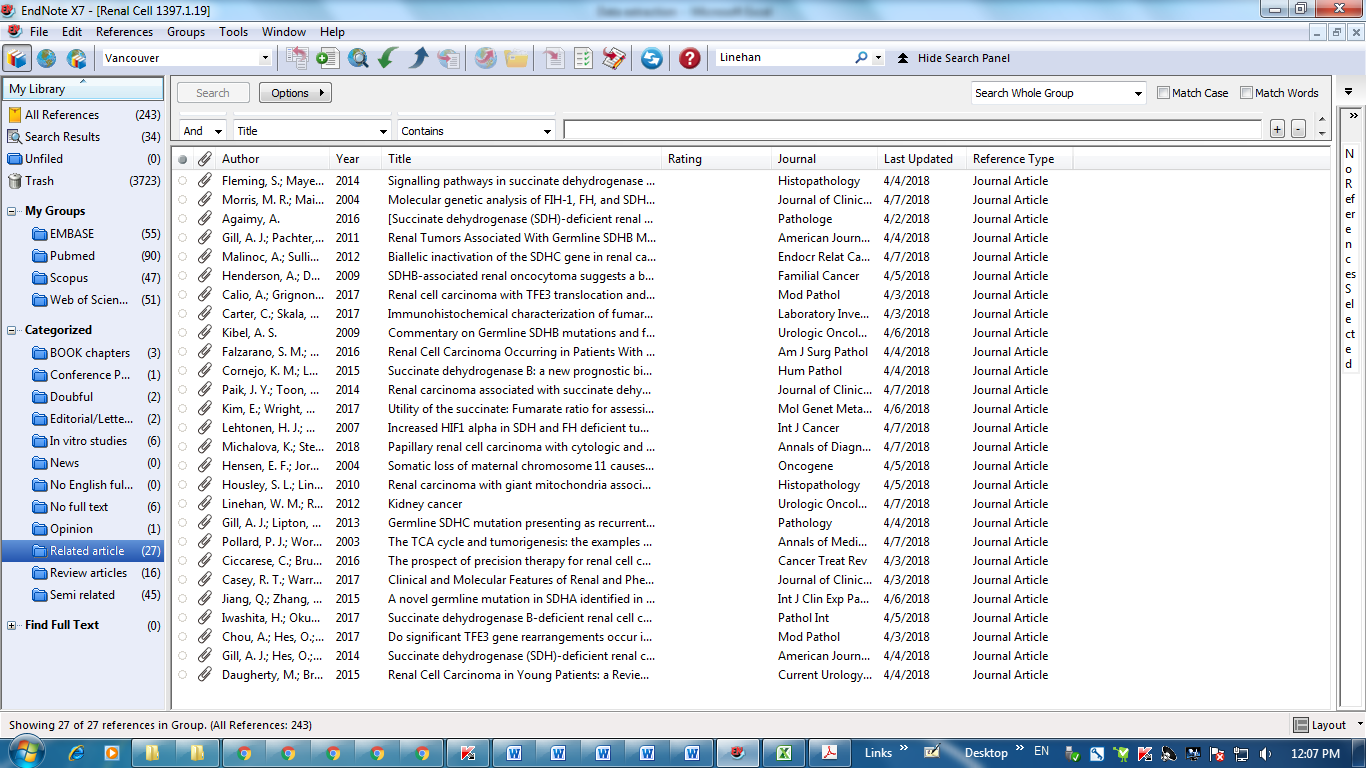


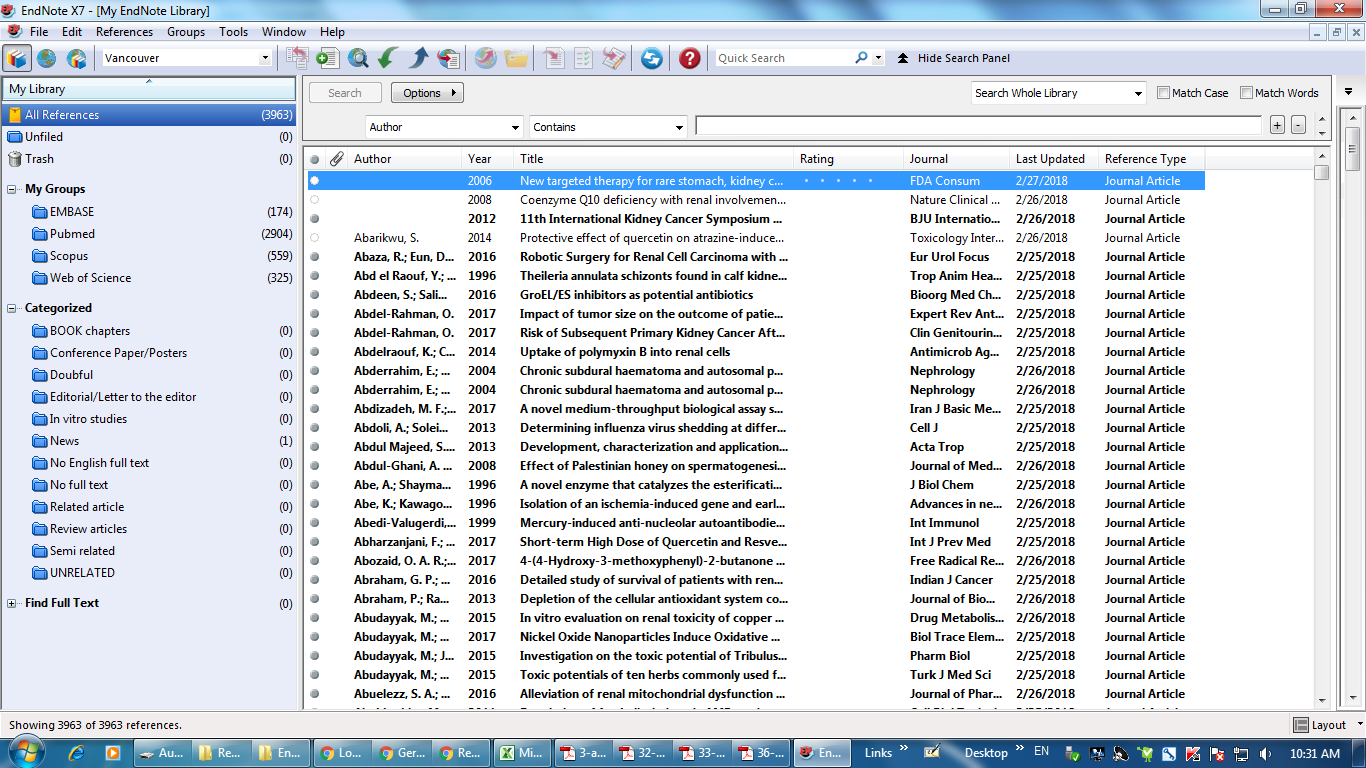


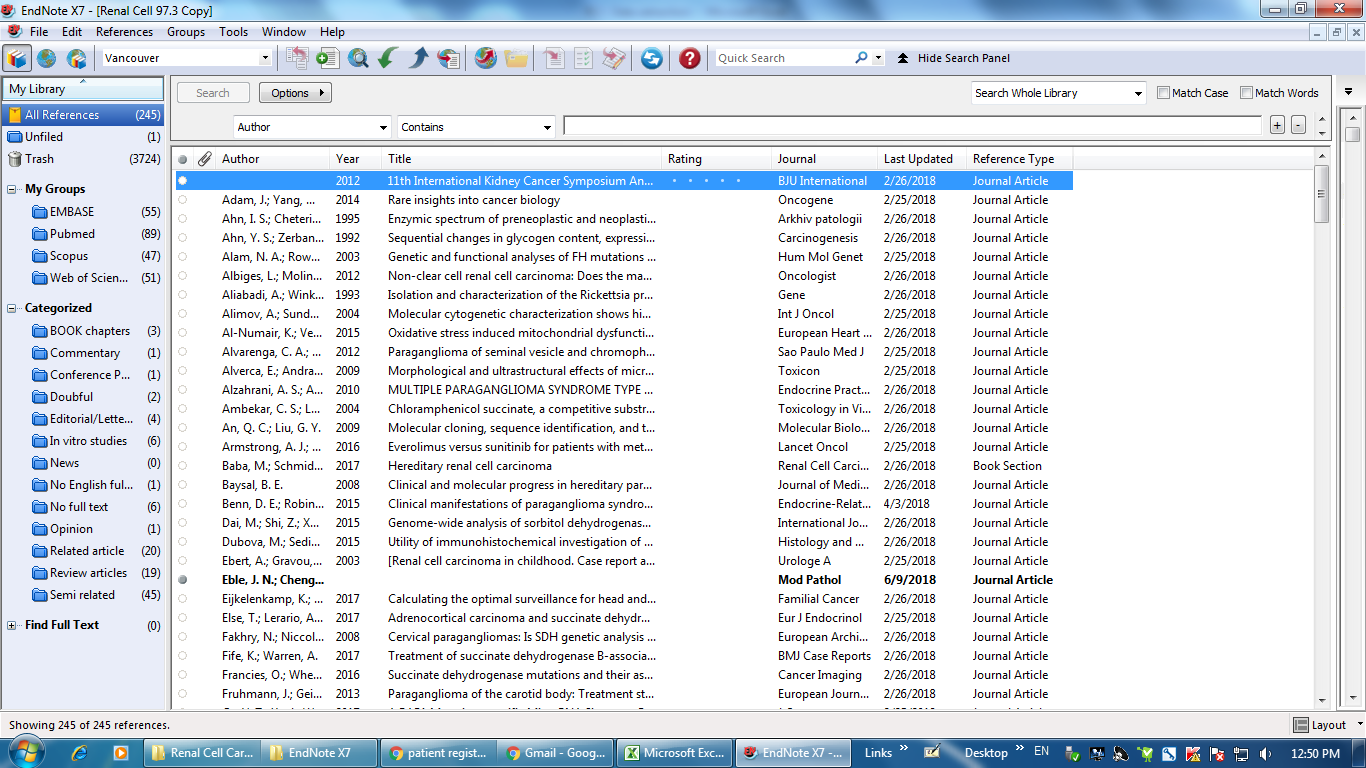

Supplement: Supplementary file 1 [file get_supplementary_file.php]
